# Supplementary material
Source: Research Square preprint supplement (doi:10.21203/rs.3.rs-9010915/v1)
Supplement: Supplementary file 1 [file 02f0ee8d993d4d867ca4e99b.docx]

**The Impact Mechanism Research of Integrated Development of Electricity, Computing Power and Energy Storage—Based on Mediating Effect Model Inspection**

Author 1 & Corresponding author **Haibo Xue*** **,** Fujian University of Technology, No.999, Dongsanhuan Road, Gushan Town, Jin'an District, Fuzhou, China; [19802160@fjut.edu.cn](mailto:19802160@fjut.edu.cn);

* Correspondence: [19802160@fjut.edu.cn](mailto:19802160@fjut.edu.cn); 1581108758

Author 2 **Yang Xu** Fujian University of Technology, No.999, Dongsanhuan Road, Gushan Town, Jin'an District, Fuzhou, China; xiaoxue886@126.com ; 15060026596

**Abstract：**Against the backdrop of the global energy transition and the in-depth advancement of the digital economy, the integrated development of electricity, computing power and energy storage has emerged as a core pathway to achieving energy security, digital transformation, and low-carbon development. This paper presents a theoretical analysis framework to examine the impact of integrating electricity, computing power, and energy storage, focusing on its direct effects on upgrading the regional industrial structure, improving energy efficiency, and constructing a new type of electricity system, as well as its indirect effects mediated by technological innovation, industrial agglomeration, and the intensity of policy support. Using panel data from 30 Chinese provinces from 2016 to 2025, the paper empirically tests the multi-path impact mechanism of electricity, computing power, and energy storage integration. Stepwise regression and bootstrap tests are adopted for the mediating effects model. The results show that: (1) the electricity, computing power and energy storage integration have a significant positive direct impact on regional high-quality development, which is more pronounced in regions with advanced digital infrastructure and superior energy resources. (2) Technological innovation and industrial agglomeration partially mediate the impact path of the electricity, computing power and energy storage integration, whereas the mediating effect of policy support intensity is insignificant. (3) The mediating effects vary across different regions. Specifically, technological innovation plays a stronger mediating role in eastern China, while industrial agglomeration has a more significant impact in central and western China. This paper clarifies the transmission path of electricity, computing power and energy storage integration, providing empirical evidence and policy implications for optimizing the integrated industrial development model and promoting high-quality economic growth.

**Keywords:** Electricity-Computing Power-Energy Storage Integration; Impact Mechanism; Mediating Effect Model; Technological Innovation; Industrial Agglomeration

**JEL: Q10; Q13;**

**Author Contributions:** Methodology, H.X; Formal analysis, H.X.; Data curation, Y.X.; Writing—original draft, H.X. and Y.X..; writing—review and editing, H.X. and Y.X.; All authors have read and agreed to the published version of the manuscript.

**Funding:** This research was supported by “Fujian Social Science Fund Project”, grant number FJ2023BF121.

**Institutional Review Board Statement:** Not applicable.

**Informed Consent Statement:** Not applicable.

**Data Availability Statement:** Data on the results of this study may be made available to the corresponding author upon reasonable request.

**Acknowledgement:** Thanks to the reviewers, academic editor, the editorial board, managing editor and the teachers of the editorial department for their comments and suggestions. The authors take full responsibility for their writing.

**Conflicts of Interest:** The authors declare no conflicts of interest.
